# Supplementary material for: Synthesis of degradable polyester with high molecular weight and excellent mechanical properties through copolymerization modification of poly(butylene succinate)
Source: Royal Society of Chemistry journal article supplement (doi:10.1039/d4py01050g), 2024-01-01
Supplement: d4py01050g1.pdf [file d4py01050g1.pdf]

## ***Supporting Information***

Synthesis of degradable polyester with high molecular weight and excellent mechanical properties through copolymerization modification of poly(butylene succinate)

Hongji Wang, Xiaojun Ma, Hanyu Yao, Haohao Chang, Yin Lv \*, Zhong Wei \*

*School of Chemistry and Chemical Engineering /*

*State Key Laboratory Incubation Base for Green Processing of Chemical Engineering,*

*Shihezi University, Shihezi 832000, China*

\*Correspondence to: Dr. Yin Lv (E-mail: ag\_125@163.com; Lvyin125@shzu.edu.cn)

Prof. Zhong Wei (E-mail: steven\_weiz@sina.com; wzhong@shzu.edu.cn)

### **Contents:**

Total number of Pages: 4

Total number of Figures: 2

Total number of Tables: 3

## 1. Chemical Structures of PBS and PBTCDS

The number-average sequence lengths ( $L_{n,SB}$  and  $L_{n,ST}$ ) and the degree of randomness ( $R$ ) were confirmed through  $^{13}\text{C}$  NMR, as shown in Figure S1 and Table S1. The signals at 172.28 ppm, 64.16 ppm, 29.01 ppm and 25.20 ppm were affiliated with the carbon of carbonyl (A),  $-\text{OCH}_2$  (B),  $-\text{COCH}_2$  (C) and  $-\text{CH}_2$  (D) of PBS [1], respectively. The carbon of  $-\text{COCH}_2$  (C) was selected for the study of the sequence distribution, and the  $L_{n,SB}$ ,  $L_{n,ST}$ , and  $R$  were calculated according to the following Equations (1)-(3) [1].

$$L_{n,SB} = 1 + 2I_{C1} / I_{C2} \quad (1)$$

$$L_{n,ST} = 1 + 2I_{C3} / I_{C2} \quad (2)$$

$$R = 1 / L_{n,SB} + 1 / L_{n,ST} \quad (3)$$

Where  $I_{C1}$ ,  $I_{C2}$ , and  $I_{C3}$  represent the integrated intensities of SB/SB, SB/ST, and ST/ST, respectively. Only the C peak exhibits splitting, resulting in C1 and C2. This may be attributed to the high boiling point of TCD, which prevents it from escaping during the polycondensation process, thus preventing the formation of ST/ST segments and making it impossible to detect the C3 peak. Consequently,  $I_{C3}$  is set to 0.

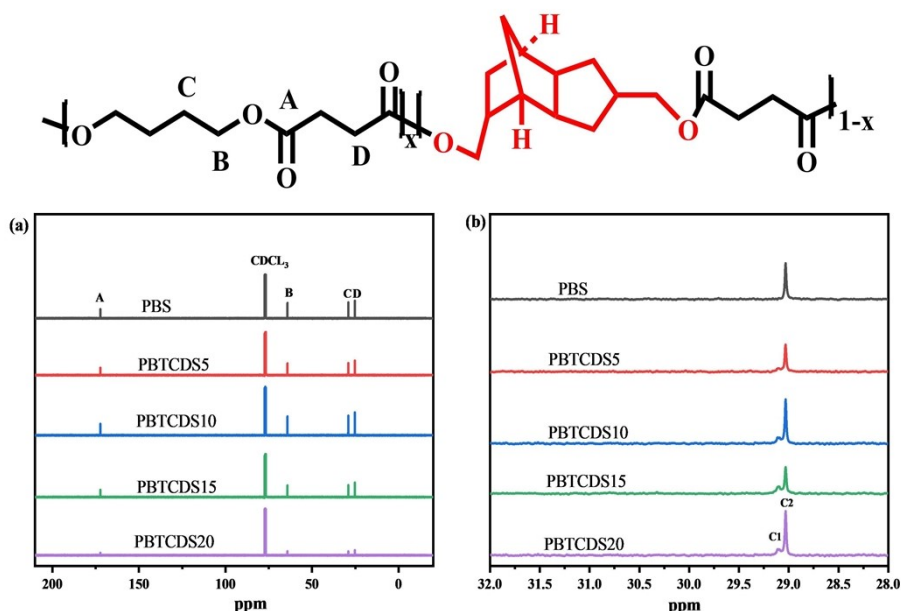

**Figure S1** (a)  $^{13}\text{C}$  NMR spectra of PBS and PBTCDS $_x$ , and (b) amplified images of the spectra between 28.0 and 32.0 ppm.

**Table S1** Composition and molecular weight degree of PBS and PBTCDStx

| Sample    | <sup>a</sup> L <sub>n,SB</sub> | L <sub>n,ST</sub> | R    |
|-----------|--------------------------------|-------------------|------|
| PBS       | -                              | -                 | -    |
| PBTCDSt5  | 1.44                           | 1                 | 1.69 |
| PBTCDSt10 | 1.70                           | 1                 | 1.58 |
| PBTCDSt15 | 2.04                           | 1                 | 1.49 |
| PBTCDSt20 | 2.96                           | 1                 | 1.34 |

## 2. SEM micrographs before and after hydrolytic degradation

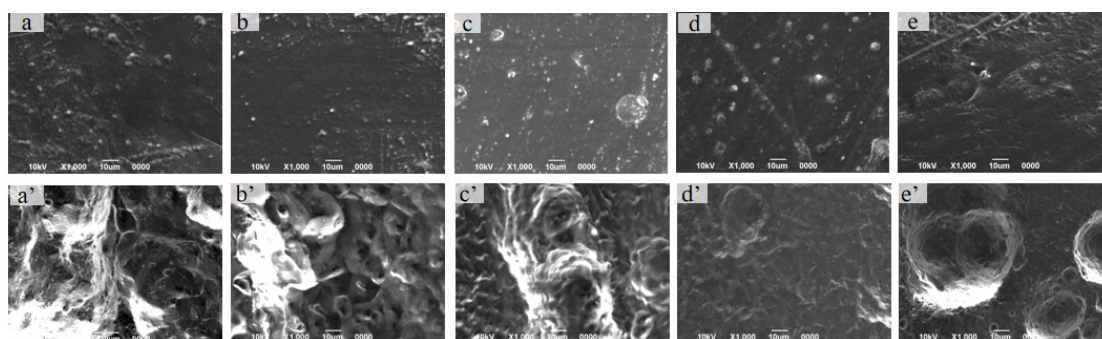

**Figure S2** SEM images of film surface before and after degradation of 20 days at 40°C and pH=14 for PBS (a and a'), PBTCDSt5 (b and b'), PBTCDSt10 (c and c'), PBTCDSt15(d and d'), PBTCDSt20 (e and e')

## 3. Thermal properties of PBTCDStx polyester

**Table S2** Thermal properties of the first heating scan of PBS and PBTCDStx

| Sample    | T <sub>m</sub> (°C) | ΔH <sub>m</sub> (J/g) |
|-----------|---------------------|-----------------------|
| PBS       | 122.1               | 73.52                 |
| PBTCDSt5  | 111.1               | 70.14                 |
| PBTCDSt10 | 98.5                | 31.89                 |
| PBTCDSt15 | 92.8                | 35.46                 |
| PBTCDSt20 | 81.3                | 27.08                 |

## 4. Mechanical properties of PBTCDStx polyester

**Table S3** The yield modulus of the PBS and PBTCDSx

| Sample   | Yield stress (MPa) |
|----------|--------------------|
| PBS      | 34.5±0.7           |
| PBTCDS5  | 22.3±0.6           |
| PBTCDS10 | 19.3±0.6           |
| PBTCDS15 | 13.3±0.6           |
| PBTCDS20 | 9.3±0.6            |

## REFERENCES

- [1] Hu, H.; Tian, Y.; Kong, Z.; Ying, W. B.; Zhu, J. A high performance copolyester with "locked" biodegradability: Solid stability and controlled degradation enabled by acid-labile acetal. ACS Sustainable Chem. Eng. 2021, 9 (5).
